# Supplementary figures and images for: Diagnostic Accuracy of Ultrasound Guided Percutaneous Pleural Needle Biopsy for Malignant Pleural Mesothelioma
Source: MDPI journal article supplement (doi:10.3390/jcm13092600), 2024-04-29

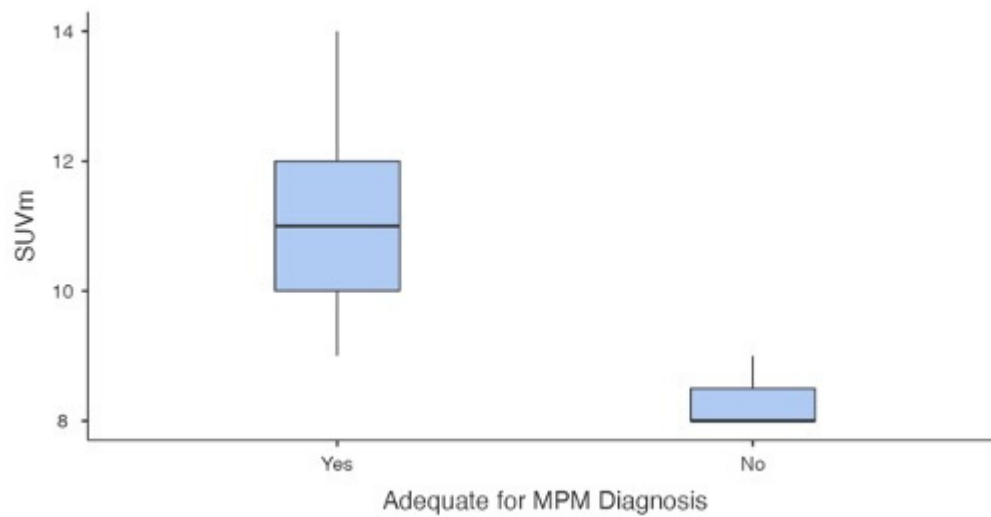

**Figure S1.** Correlation between diagnostic accuracy and 18-FDG-PET-CT avidity value (SUVmax).

Supplement: s1 [file s1]
